# Supplementary material for: High density SNP array and reanalysis of genome sequencing uncovers CNVs associated with neurodevelopmental disorders in KOLF2.1J iPSCs
Source: PubMed Central journal article supplement — bioRxiv. 2023 Jun 26:2023.06.26.546614. Preprint. [Version 1] doi: 10.1101/2023.06.26.546614 (PMC10327134; doi:10.1101/2023.06.26.546614), 2023-06-26
Supplement: NIHPP2023.06.26.546614v1-supplement-1.pdf [file NIHPP2023.06.26.546614v1-supplement-1.pdf]

## Supplemental Information

### Supplemental Figure 1

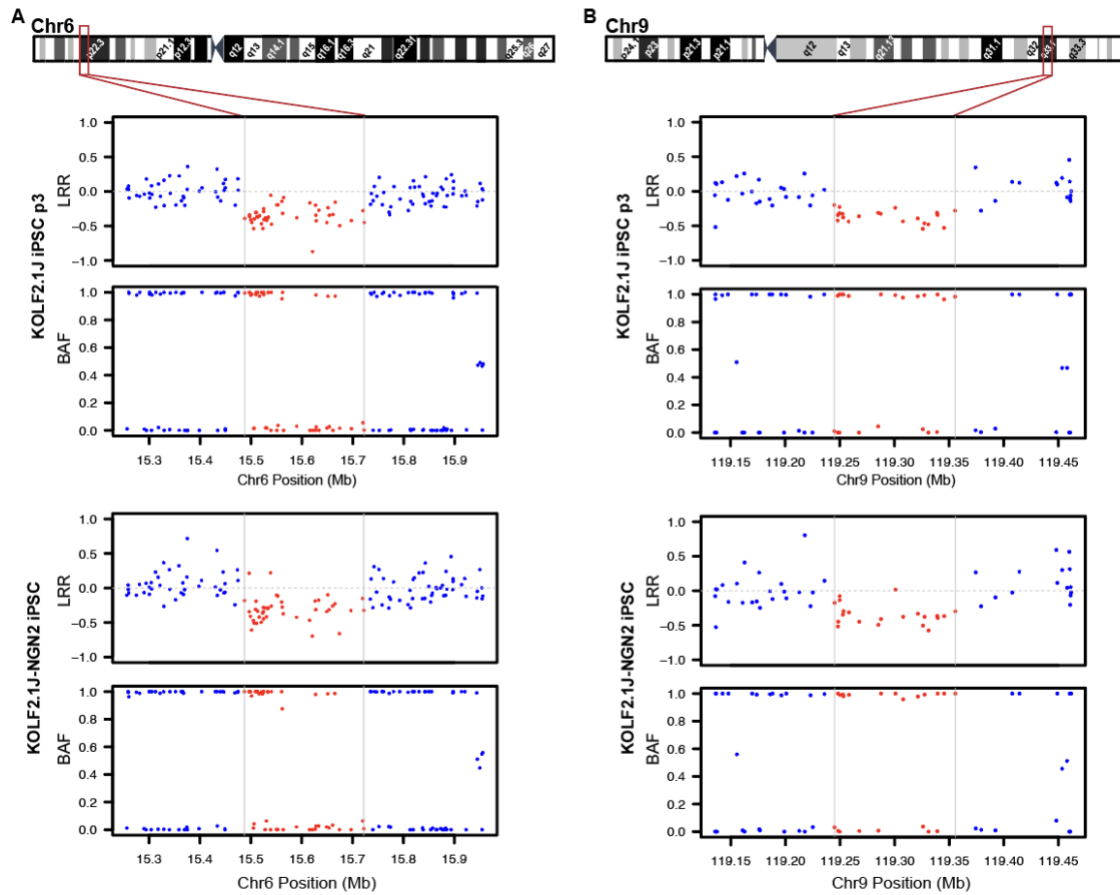

**Supplemental Figure 1: High density SNP array uncovers CNVs affecting coding genes in Chr6p22 and Chr9q33 in a stock of KOLF2.1J iPSCs and KOLF2.1J with doxycycline inducible *NGN2* transgene. (A)** Chromosome 6 cytoband schematics (top) and Log R Ratio (LRR) and B Allele frequency (BAF) plots (bottom) show reduction of signal intensity and a loss of heterozygosity in 6p22 region of KOLF2.1J iPSCs p3 and KOLF2.1J-NGN2. **(B)** Chromosome 9 cytoband schematics (top) and LRR and BAF plots (bottom) show reduction of signal intensity and a loss of heterozygosity in 9q33 region of KOLF2.1J iPSCs p3 and KOLF2.1J-NGN2.

### Supplemental Figure 2

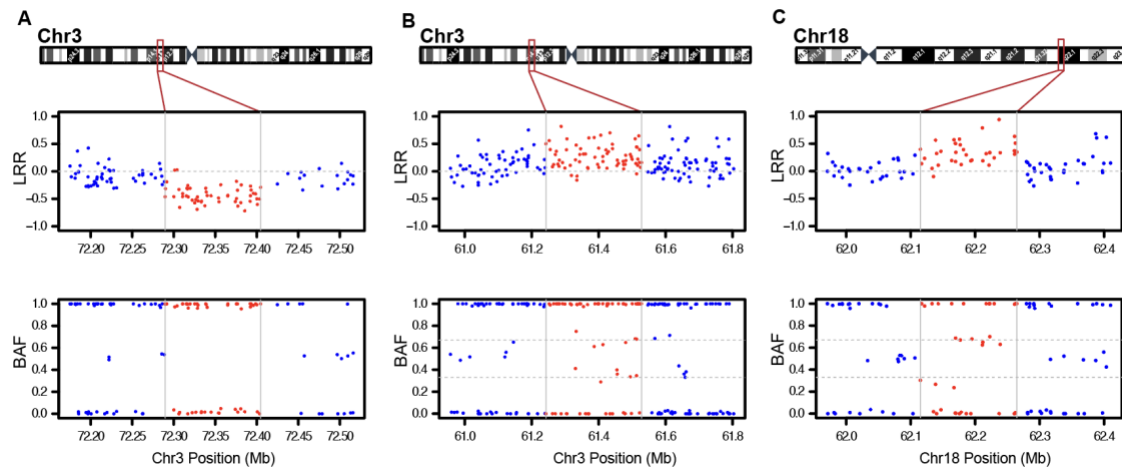

**Supplemental Figure 2: CNVs detected by SNP array in Chr3 and Chr18 do not overlap with coding regions. (A-B)** Chromosome 3 cytoband schematics (top) and LRR and BAF plots (bottom) showing reduction of signal intensity and a loss of heterozygosity in 3p13 deleted region (A) and increased signal intensity and altered BAF in 3p14 duplicated region (B) of KOLF2.1J iPSCs compared to a control iPSC line. **(C)** Chromosome 18 cytoband schematics (top) and LRR and BAF plots (bottom) showing increased signal intensity and altered BAF in 18q22 duplicated region of KOLF2.1J iPSCs.

**Supplemental Figure 3**

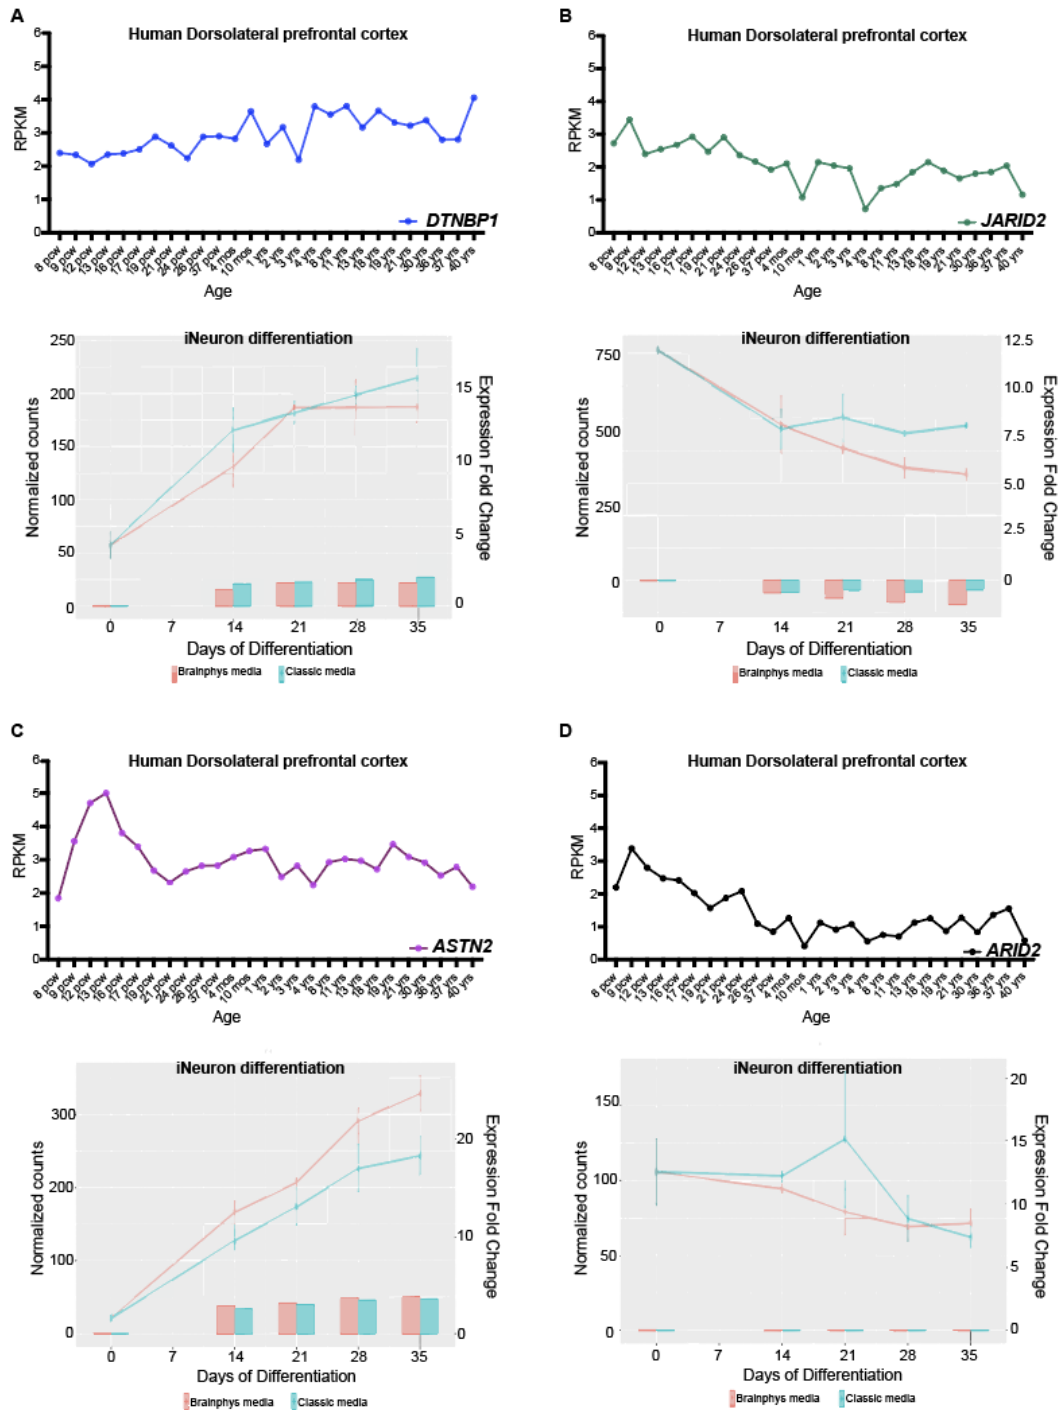

**Supplemental Figure 3: Genes affected by Chr6p22 and Chr9q33 are expressed in neurons in the developing and adult brain. (A-D)** *DTNBP1* (A), *JARID2* (B), *ASTN2* (C) and *ARID2* (D) expression in developing and adult human prefrontal cortex and in hPSC to iNeuron differentiation. Human prefrontal cortex expression data is retrieved from Brainspan (<https://www.brainspan.org/rnaseq/search/index.html>) and iNeuron differentiation expression plots from the web app created by Connor Ludwig, Kampmann Lab (<https://kampmannlab.ucsf.edu/ineuron-rna-seq>). Pcw; postconception week. Yrs; years.

## Supplemental Figure 4

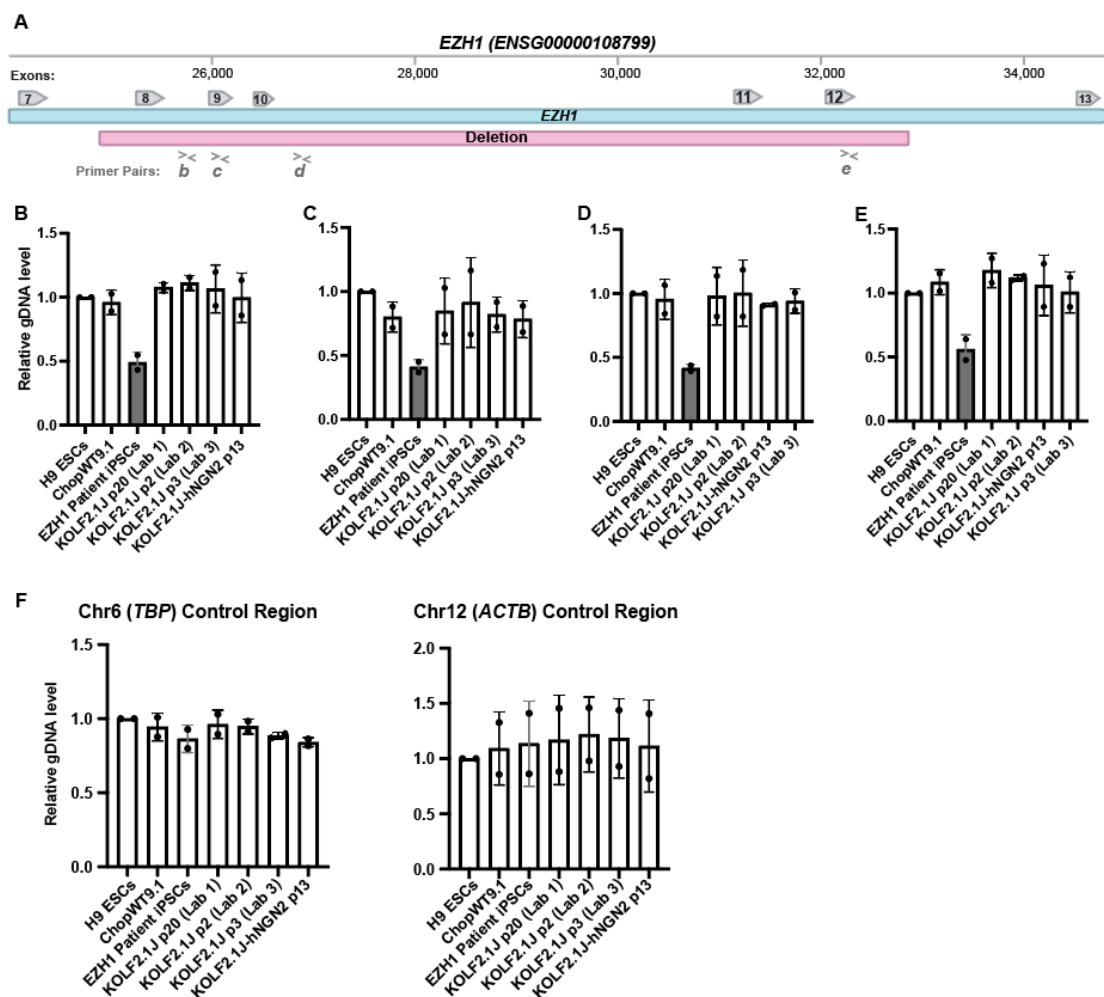

**Supplemental Figure 4: gDNA qPCR on an iPSC line with one copy of *EZH1* exon 8-12 deletion demonstrates sensitivity of the technique for detection of hemizygous regions. (A)** Schematic representation of *EZH1* exon 7-13. Red line illustrates the region deleted in a *EZH1* patient iPSC line. Arrowheads ( $>$ ,  $<$ ) labeled with b-e indicate position of the primers used for gDNA qPCR. **(B-E)** gDNA qPCR results showing half levels amplification in regions deleted in *EZH1* patient iPSCs compared to control and KOLF2.1Js that are expected to be diploid. **(F)** Randomly selected regions of the genome show similar amplification levels across all the hPSC lines.

### Supplemental Figure 5

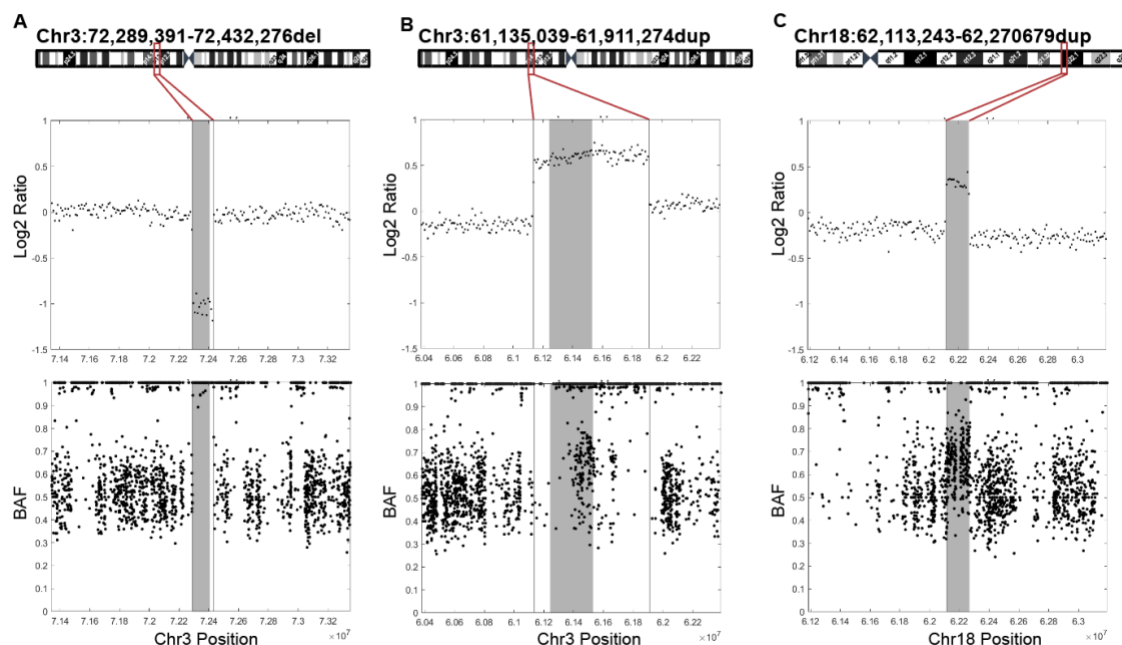

**Supplemental Figure 5: Genome sequencing reanalysis confirms CNVs at Chr3p13, Chr3p14 and Chr18q22. (A-C).** Chromosome cytoband schematics with base resolution breakpoints of the CNVs (top) and LRR and BAF plots (bottom) obtained from the KOLF2.1J iPSC genome sequencing reanalysis. LRR plots show reduction of signal intensity and BAF plots show loss of heterozygosity in Chr3p13 (A) and gain of signal intensity and altered BAF in Chr3p14 (B) and Chr18q22 (C) CNV regions compared to diploid up and downstream regions. Shaded area represents the CNV defined by the SNP array and vertical lines the base-resolution breakpoints determined from the genome sequencing data.

### Supplemental Figure 6

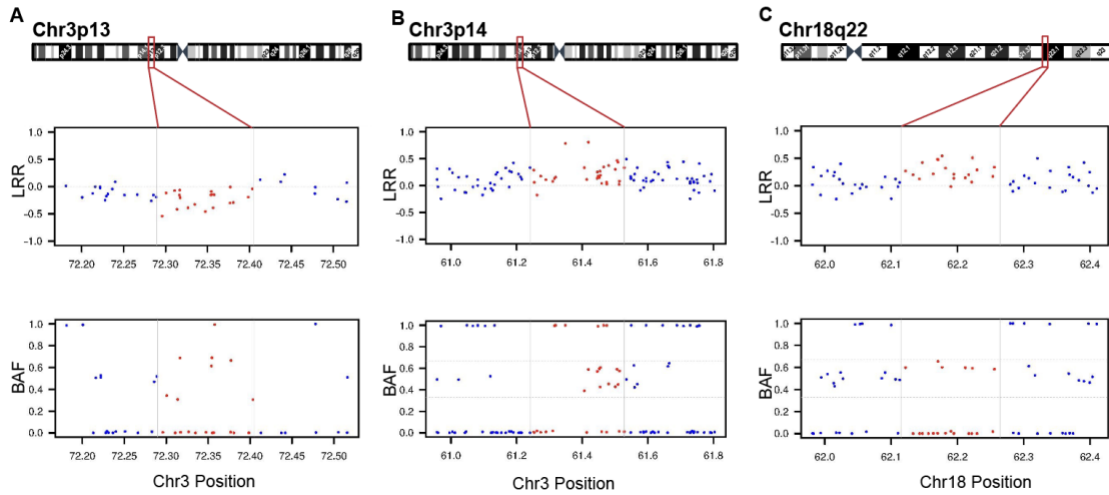

**Supplemental Figure 6: Chr3p13, Chr3p14 and Chr18q22 CNVs in KOLF2.1J were inherited from KOLF2 iPSC line. (A, B) LRR and BAF plots of the KOLF2 iPSC line SNP array deposited in HipSci, show that KOLF2 iPSC line carries two of the Chr3p14 (B) and Chr18q22 (C) CNVs in heterozygosity and is likely mosaic for Chr3p13 (A) deletion.**

**Supplementary Table 1: Description and sequence of primers used across the study**

| Primer Pair | Targeted Region (GRCh37/hg19) | Notes                                                             | Primer Orientation | Sequence (5'→3')        | Product Length (bp) |
|-------------|-------------------------------|-------------------------------------------------------------------|--------------------|-------------------------|---------------------|
| 1           | chr6:15372726+15372836        | Upstream deleted Chr6 region                                      | Forward            | gactacagggcgtgcaccaccac | 111                 |
|             |                               |                                                                   | Reverse            | aaggcggacggatcacaggga   |                     |
| 2           | chr6:15270358+15270456        | Upstream deleted Chr6 region                                      | Forward            | tctgtccgtccgtcctccgtc   | 99                  |
|             |                               |                                                                   | Reverse            | aggaggtggaggctgcagtgag  |                     |
| 3           | chr6:15487546+15487631        | Within deleted Chr6 region in <i>JARID2</i> : Exon 6              | Forward            | ggtccagcaggtaacacggg    | 86                  |
|             |                               |                                                                   | Reverse            | tcgctgtctctccttggcg     |                     |
| 4           | chr6:15500050+15500126        | Within deleted Chr6 region in <i>JARID2</i>                       | Forward            | gctgtgtcccatccctggct    | 77                  |
|             |                               |                                                                   | Reverse            | gaaccacctcggcagacacagc  |                     |
| 5           | chr6:15514462+15514592        | Within deleted Chr6 region in <i>JARID2</i>                       | Forward            | acacactctggtagggacgcc   | 131                 |
|             |                               |                                                                   | Reverse            | gcactgtgaaagggacgaggc   |                     |
| 6           | chr6:15723401+15723550        | Within deleted Chr6 region                                        | Forward            | acctctcaggctctcacgttccc | 150                 |
|             |                               |                                                                   | Reverse            | agcaggagttggaccacagga   |                     |
| 7           | chr6:15803765+15803892        | Downstream Chr6 deleted region                                    | Forward            | tccttcccctcccgcacata    | 128                 |
|             |                               |                                                                   | Reverse            | ttggttggcgtgccacctgc    |                     |
| 8           | chr6:15889438+15889552        | Downstream Chr6 deleted region                                    | Forward            | gtctgagcgggactggaccctt  | 115                 |
|             |                               |                                                                   | Reverse            | cgttggcgtccctgtggagac   |                     |
| 9           | chr9:119229497+119229617      | Upstream deleted Chr9 region                                      | Forward            | tgagccagcacagcaaaact    | 121                 |
|             |                               |                                                                   | Reverse            | gccaagatcgaccactgcact   |                     |
| 10          | chr9:119249647+119249723      | Within deleted Chr9 region: Exon 20                               | Forward            | ccgtcgggctccagacactga   | 77                  |
|             |                               |                                                                   | Reverse            | gcagctggtcgaagcctaggag  |                     |
| 11          | chr9:119302810+119302918      | Within deleted Chr9                                               | Forward            | gcttgggtgacagcttggcct   | 109                 |
|             |                               |                                                                   | Reverse            | tagatggcctgcttggctcct   |                     |
| 12          | chr9:119366867+119366974      | Within deleted Chr9                                               | Forward            | ccatggcccacactgcatgagg  | 108                 |
|             |                               |                                                                   | Reverse            | agctgagaggatggtggcagca  |                     |
| 13          | chr9:119382905+119382984      | Downstream deleted Chr9 region                                    | Forward            | ccctcccaggagccacaatga   | 80                  |
|             |                               |                                                                   | Reverse            | ggagtgccaagcctaggggaca  |                     |
| 14          | chr17:40870724-40870832       | Within <i>EZH1</i> Intron between Exon 8 and 9                    | Forward            | ccaacattgcccaaccagca    | 109                 |
|             |                               |                                                                   | Reverse            | ggtctccaaggaggatgggt    |                     |
| 15          | chr17:40870536-40870611       | Within <i>EZH1</i> Exon 9                                         | Forward            | agacccaatgcacttcccct    | 76                  |
|             |                               |                                                                   | Reverse            | tgctcccgtgcacagacttg    |                     |
| 16          | chr17:40869846-40869952       | Within <i>EZH1</i> Intron between Exon 10 and 11                  | Forward            | ggaacacaagccagctgagcca  | 107                 |
|             |                               |                                                                   | Reverse            | gagcgttcccacagtaactggg  |                     |
| 17          | chr17:40864313-40864437       | Within <i>EZH1</i> Exon 12                                        | Forward            | tagtggagcaccctcggagcc   | 125                 |
|             |                               |                                                                   | Reverse            | gcacgttgggtcccagaagc    |                     |
| 18          | chr6:170863510+170863606      | Chr6 control region within <i>TBP</i>                             | Forward            | cttgccttccgtgcccatag    | 97                  |
|             |                               |                                                                   | Reverse            | ctcagtgcagtgggtgcttgc   |                     |
| 19          | chr7:5596654-5596787          | Chr7 control region within <i>ACTB</i>                            | Forward            | tgcttctctgtgcccctcc     | 134                 |
|             |                               |                                                                   | Reverse            | acgggttctactgtctgccc    |                     |
| 20          | chr12:6644756+6644900         | Chr12 control region within <i>GAPDH</i> (used for normalization) | Forward            | ttcaccgcaaaatggcccctc   | 145                 |
|             |                               |                                                                   | Reverse            | ccagacacccaatcctccgggt  |                     |
| 21          | chr6:15481823+15729819        | Chr6 Breakpoint Sanger Seq                                        | Forward            | tacctgtcttggctctgtcg    |                     |
|             |                               |                                                                   | Reverse            | atctgagccagcatgtagagg   |                     |
| 22          | chr9:119240899+119372879      | Chr9 Breakpoint Sanger Seq                                        | Forward            | ttcttcacctggactagacc    |                     |
|             |                               |                                                                   | Reverse            | gcagaatttgcctttgtcg     |                     |
